# Supplementary material for: Similar foraging energetics of two sympatric albatrosses despite contrasting life histories and wind-mediated foraging strategies
Source: Oxford University Press journal article supplement (doi:10.1242/jeb.228585), 2020-12-01
Supplement: jeb228585supp.pdf [file jeb228585supp.pdf]

**Table S1.** Effects of species, sex, and year and their interaction on sampling and energetic variables during guard stage. Means  $\pm$  SD are presented for each species with N (year 2011/2012) in parentheses.

|                                            | Campbell          |                   | Grey-headed     |                   | F Ratio            |                    |                    |       |               |
|--------------------------------------------|-------------------|-------------------|-----------------|-------------------|--------------------|--------------------|--------------------|-------|---------------|
|                                            | Female<br>(5/7)   | Male<br>(6/8)     | Female<br>(3/5) | Male<br>(7/11)    | Sp                 | Sex                | Yr                 | Sp*Yr | Sp*Sex<br>*Yr |
| <b>Chick age</b>                           | 8.5 $\pm$ 8.6     | 6.0 $\pm$ 5.0 (4) | 14 $\pm$ 8.0    | 11 $\pm$ 6.6      | 5.52*              | 0.06               | 0.62               | --    | --            |
| <b>(days)</b>                              | 4.3 $\pm$ 2.3 (6) | 7.2 $\pm$ 2.5 (6) | 7.7 $\pm$ 3.0   | 6.9 $\pm$ 2.3     |                    |                    |                    |       |               |
| Pre-trip fasting duration (days)           | 6.8 $\pm$ 8.8 (3) | 1.6 $\pm$ 1.0 (4) | 3.7 $\pm$ 1.6   | 3.1 $\pm$ 1.1 (6) | -0.55 <sup>t</sup> | -1.00 <sup>t</sup> | -0.83 <sup>t</sup> | --    | --            |
| Post-trip nest time (hours)                | 4.2 $\pm$ 3.15    | 3.6 $\pm$ 3.3 (6) | 4.6 $\pm$ 2.3   | 4.9 $\pm$ 2.2     |                    |                    |                    |       |               |
|                                            | 1.2 $\pm$ 0.7     | 1.7 $\pm$ 1.3     | 1.3 $\pm$ 0.5   | 3.7 $\pm$ 5.0     | -1.61 <sup>t</sup> | 1.82 <sup>t</sup>  | 0.84 <sup>t</sup>  | --    | --            |
|                                            | 1.1 $\pm$ 0.8     | 1.7 $\pm$ 2.1     | 1.5 $\pm$ 0.7   | 2.3 $\pm$ 2.0     |                    |                    |                    |       |               |
| Pre-trip body mass (kg)                    | 2.88 $\pm$ 0.39   | 3.28 $\pm$ 0.27   | 2.64 $\pm$ 0.12 | 3.15 $\pm$ 0.26   | 3.26               | 32.5*              | 1.33               | --    | --            |
| TBW (% initial mass)                       | 2.80 $\pm$ 0.13   | 3.13 $\pm$ 0.21   | 2.73 $\pm$ 0.17 | 3.04 $\pm$ 0.26   |                    |                    |                    |       |               |
|                                            | 52 $\pm$ 1.8      | 53 $\pm$ 3.2      | 56 $\pm$ 3.3    | 52 $\pm$ 1.6      | 0.06               | 0.06               | 1.71               | 21.8* | 4.13*         |
|                                            | 50 $\pm$ 1.8      | 51 $\pm$ 1.4      | 56 $\pm$ 1.1    | 60 $\pm$ 4.4      |                    |                    |                    |       |               |
| Mass gain (% initial mass)                 | 3.4 $\pm$ 7.9     | 0.5 $\pm$ 8.2     | 21 $\pm$ 12     | 6.6 $\pm$ 4.8     | 11.7*              | 2.34               | 16.0*              | --    | --            |
| Water influx (mL d <sup>-1</sup> )         | 9.1 $\pm$ 8.9     | 11 $\pm$ 7.2      | 21 $\pm$ 10     | 17 $\pm$ 7.4      |                    |                    |                    |       |               |
|                                            | 166 $\pm$ 27.6    | 205 $\pm$ 94.3    | 244 $\pm$ 41.0  | 182 $\pm$ 30.6    | 5.58*              | 0.21               | 7.12*              | --    | --            |
|                                            | 202 $\pm$ 37.4    | 216 $\pm$ 53.1    | 286 $\pm$ 103   | 252 $\pm$ 63.5    |                    |                    |                    |       |               |
| <b>DEE (kJ d<sup>-1</sup>)</b>             | 2070 $\pm$ 596    | 2540 $\pm$ 782    | 2370 $\pm$ 1480 | 2480 $\pm$ 275    | 0.61               | 0.07               | 8.33*              | --    | --            |
|                                            | 1880 $\pm$ 309    | 1750 $\pm$ 279    | 2080 $\pm$ 310  | 1940 $\pm$ 682    |                    |                    |                    |       |               |
| DEE (kJ kg <sup>-1</sup> d <sup>-1</sup> ) | 714 $\pm$ 214     | 770 $\pm$ 206     | 813 $\pm$ 500   | 765 $\pm$ 105     | 0.51               | 1.38               | 9.30*              | --    | --            |
|                                            | 639 $\pm$ 85.5    | 534 $\pm$ 90.2    | 690 $\pm$ 101   | 594 $\pm$ 212     |                    |                    |                    |       |               |

Note: Variables that contributed to linear models are in bold. Values for 2011 are in white and 2012 are in grey. F values from three-way ANOVAs are presented for main effects and interaction effects. Only significant interactions are shown in table to conserve space. Where there are no significant interaction effects, F and P values are reported from the additive model. Transformations and distributions are described in methods. A t superscript indicates t values from gamlss functions. DEE calculated with the Speakman 1-pool model (Campbell albatross: 1775  $\pm$  529 kJ d<sup>-1</sup>; grey-headed albatross: 1846  $\pm$  645 kJ d<sup>-1</sup>) followed the same trends as the Nagy model (correlation = 0.99). \*P<0.05

**Table S2.** Effects of species and year and their interaction on foraging behaviors during guard stage. Means  $\pm$  SD are presented for each species with N (year 2011/2012) in parentheses.

|                                             | Campbell        |                 | Grey-headed     |                    | F Ratio |       |       |        |
|---------------------------------------------|-----------------|-----------------|-----------------|--------------------|---------|-------|-------|--------|
|                                             | Female<br>(5/7) | Male<br>(6/8)   | Female<br>(3/5) | Male<br>(7/11)     | Sp      | Sex   | Yr    | Sp*Sex |
| Trip duration<br>(days)                     | 2.4 $\pm$ 0.7   | 3.7 $\pm$ 0.8   | 4.3 $\pm$ 0.8   | 4.8 $\pm$ 1.7      | 15.8*   | 4.87* | 1.05  | --     |
| Daily distance<br>(km)                      | 323 $\pm$ 179   | 481 $\pm$ 164   | 687 $\pm$ 196   | 550 $\pm$ 151      | 8.80*   | 4.99* | 25.4* | 7.24*  |
| Maximum<br>Range (km)                       | 197 $\pm$ 75    | 594 $\pm$ 214   | 961 $\pm$ 92    | 969 $\pm$ 186      | 60.5*   | 8.95* | 2.97  | --     |
| Daily water<br>take-offs                    | 8.5 $\pm$ 2.0   | 8.3 $\pm$ 2.4   | 5.8 $\pm$ 1.8   | 6.7 $\pm$ 1.4      | 5.69*   | 1.33  | 14.9* | --     |
| Percent trip on<br>water                    | 52 $\pm$ 18     | 40 $\pm$ 12     | 27 $\pm$ 9.2    | 35 $\pm$ 6.1       | 1.54    | 3.03  | 36.6* | 5.39*  |
| Mean bird air<br>speed (m s <sup>-1</sup> ) | 8.7 $\pm$ 1.4   | 11.6 $\pm$ 1.7  | 12.1 $\pm$ 1.1  | 13.0 $\pm$ 2.4     | 1.60    | 10.8* | 21.0* | 5.63*  |
| Compensation<br>magnitude                   | 0.56 $\pm$ 0.03 | 0.54 $\pm$ 0.05 | 0.52 $\pm$ 0.02 | 0.53 $\pm$<br>0.04 | 0.02    | 0.81  | 0.18  | --     |

Note: Values for 2011 are in white and 2012 are in grey. F values from three-way ANOVAs are presented for main effects and interaction effects. Only significant interactions are shown in table to conserve space. Where there are no significant interaction effects, F and P values are reported from the additive model. Transformations and distributions are described in methods. \*P<0.05

**Table S3.** Effects of species and year and their interaction on environmental variables during guard stage. Means  $\pm$  SD are presented for each species with N (year 2011/2012) in parentheses.

|                                                      | Campbell        |                | Grey-headed     |                | F Ratio |       |       |            |           |            |               |
|------------------------------------------------------|-----------------|----------------|-----------------|----------------|---------|-------|-------|------------|-----------|------------|---------------|
|                                                      | Female<br>(5/7) | Male<br>(6/8)  | Female<br>(3/5) | Male<br>(7/11) | Sp      | Sex   | Yr    | Sp*<br>Sex | Sp*<br>Yr | Sex*<br>Yr | Sp*Sex<br>*Yr |
| Mean wind speed (m s <sup>-1</sup> )                 | 6.9 $\pm$ 1.2   | 9.13 $\pm$ 1.5 | 9.3 $\pm$ 1.3   | 9.4 $\pm$ 1.7  | 0.37*   | 9.06* | 16.0* | 8.20*      | --        | --         | --            |
| <b>Mean wind speed at takeoff (m s<sup>-1</sup>)</b> | 9.5 $\pm$ 2.6   | 11.0 $\pm$ 1.7 | 11.5 $\pm$ 0.5  | 10.3 $\pm$ 0.8 |         |       |       |            |           |            |               |
| Mean wind angle on bird (180°)                       | 6.8 $\pm$ 1.7   | 9.0 $\pm$ 1.3  | 8.6 $\pm$ 1.9   | 9.3 $\pm$ 2.3  | 0.44    | 6.40* | 8.63* | 4.33*      | --        | --         | --            |
| % Light wind <sup>t</sup>                            | 9.17 $\pm$ 2.9  | 10.8 $\pm$ 1.8 | 10.9 $\pm$ 1.5  | 9.9 $\pm$ 1.3  |         |       |       |            |           |            |               |
| % Strong headwind <sup>t</sup>                       | 85 $\pm$ 9.3    | 90 $\pm$ 12    | 94 $\pm$ 6.0    | 83 $\pm$ 6.0   | 1.75    | 0.00  | 0.96  | --         | --        | --         | --            |
| % Strong tailwind <sup>t</sup>                       | 82 $\pm$ 5.6    | 85 $\pm$ 5.4   | 93 $\pm$ 9.0    | 90 $\pm$ 5.8   |         |       |       |            |           |            |               |
| % Crosswind                                          | 5.2 $\pm$ 8.4   | 5.2 $\pm$ 4.3  | 4.6 $\pm$ 7.6   | 2.9 $\pm$ 5.1  | -0.8*   | 0.00  | -2.6* | 0.36       | 2.49*     | 2.58*      | -2.26*        |
| Mean SST at rest (°C)                                | 9.11 $\pm$ 16   | 0.4 $\pm$ 0.7  | 3.3 $\pm$ 2.0   | 4.4 $\pm$ 3.7  |         |       |       |            |           |            |               |
|                                                      | 1.1 $\pm$ 2.4   | 0.7 $\pm$ 1.5  | 1.4 $\pm$ 1.9   | 1.0 $\pm$ 0.9  | 10.07   | 0.31  | 1.89  | --         | --        | --         | --            |
|                                                      | 1.7 $\pm$ 2.11  | 2.4 $\pm$ 2.5  | 2.3 $\pm$ 0.9   | 1.6 $\pm$ 1.3  |         |       |       |            |           |            |               |
|                                                      | 0.0 $\pm$ 0.0   | 0.8 $\pm$ 1.4  | 2.0 $\pm$ 2.0   | 1.0 $\pm$ 1.0  | -0.18   | -2.5* | 1.03  | 2.64*      | --        | --         | --            |
|                                                      | 0.3 $\pm$ 0.7   | 1.5 $\pm$ 2.7  | 2.0 $\pm$ 2.7   | 1.2 $\pm$ 1.0  |         |       |       |            |           |            |               |
|                                                      | 18 $\pm$ 13     | 33 $\pm$ 8.4   | 48 $\pm$ 9.3    | 41 $\pm$ 9.4   | 4.04    | 7.95* | 13.6* | 9.09*      | 5.82*     | --         | --            |
|                                                      | 37 $\pm$ 15     | 44 $\pm$ 9.4   | 48 $\pm$ 5.0    | 41 $\pm$ 7.8   |         |       |       |            |           |            |               |
|                                                      | 8.6 $\pm$ 0.3   | 7.7 $\pm$ 1.2  | 5.1 $\pm$ 0.7   | 6.5 $\pm$ 1.6  | 40.1*   | 3.18  | 0.15  | --         | --        | --         | --            |
|                                                      | 8.6 $\pm$ 0.3   | 7.5 $\pm$ 1.6  | 6.7 $\pm$ 1.2   | 5.7 $\pm$ 1.0  |         |       |       |            |           |            |               |

Note: Variables that contributed to linear models are in bold. Values for 2011 are in white and 2012 are in grey. F values from three-way ANOVAs are presented for main effects and interaction effects. Only significant interactions are shown in table to conserve space. Where there are no significant interaction effects, F and P values are reported from the additive model. Transformations and distributions are described in methods. A t superscript indicates t values from gamlss or Tweedie functions. \*P<0.05
